# Supplementary material for: DNA barcoding reveals twelve lineages with properties of phylogenetic and biological species within Melitaea didyma sensu lato (Lepidoptera, Nymphalidae)
Source: Zookeys. 2015 Nov 19;(538):35–46. doi: 10.3897/zookeys.538.6605 (PMC4722858; doi:10.3897/zookeys.538.6605)
Supplement: Supplementary material 1 — Table S1 [file zookeys-538-035-s001.xls]

## Sheet: Лист1
Supplementary Table S1. Collection data of the samples sequenced in this study
GenBank#	Sample ID	haplogroup	Collection	Collectors	Collection Date	Country	Province	Region	Sector	Exact Site	Latitude	Longitude	Elevation
KT792884	83008	arduinna	Zoological Institute of the Russian Academy of Science	E. Pazhenkova	12 June 2014	Russia	Bashkortostan		Zilair district		52° 3'54.27"N	57°26'28.75" E
KT792885	87011	arduinna	Zoological Institute of the Russian Academy of Science	E. Pazhenkova	14 June 2014	Russia	Bashkortostan		Zilair district		52° 3'54.27"N	57°26'28.75" E
KT792886	89014	athalia	Zoological Institute of the Russian Academy of Science	E. Pazhenkova	14 June 2014	Russia	Samara oblast		Syzran district	Racheyskie skaly	53°4'07.70'' N	48°0'61.81'' E
KT792889	77007	britomartis	Zoological Institute of the Russian Academy of Science	E. Pazhenkova	12 June 2014	Russia	Bashkortostan		Zilair district		52° 3'54.27"N	57°26'28.75" E
KT792894	182032	britomartis	Zoological Institute of the Russian Academy of Science	D. Shovkoon	22 June 2014	Russia	Orenburg oblast			Tugustemir, Nakas
KT792891	110018	britomartis	Zoological Institute of the Russian Academy of Science	E. Pazhenkova	29 June 2014	Russia	Samara oblast			Bachilova polyana	53°4'28.68'' N	49°6'61.82" E
KT792892	111018	britomartis	Zoological Institute of the Russian Academy of Science	E. Pazhenkova	29 June 2014	Russia	Samara oblast			Bachilova polyana	53°4'28.68'' N	49°6'61.82" E
KT792887	53025	britomartis	Zoological Institute of the Russian Academy of Science	E. Pazhenkova	5 July 2014	Russia	Samara oblast		Kinel district		53°0'13.89'' N	50°9'24.60'' N
KT792890	90014	britomartis	Zoological Institute of the Russian Academy of Science	E. Pazhenkova	7 June 2014	Russia	Samara oblast		Syzran district	Racheyskie skaly	53°4'07.70'' N	48°0'61.81'' E
KT792893	155014	britomartis	Zoological Institute of the Russian Academy of Science	E. Pazhenkova	7 June 2014	Russia	Samara oblast		Syzran district	Racheyskie skaly	53°4'07.70'' N	48°0'61.81'' E
KT874732	CCDB-17967 G02	cinxia	Zoological Institute of the Russian Academy of Science	V. Lukhtanov, A. Novikova, N. Shapoval & A. Vershinina	21 March 2014	Israel			Hermon
KT874751	CCDB-17967 G03	cinxia	Zoological Institute of the Russian Academy of Science	V. Lukhtanov, A. Novikova, N. Shapoval & A. Vershinina	21 March 2014	Israel			Hermon
KT792896	99017	cinxia	Zoological Institute of the Russian Academy of Science	E. Pazhenkova	27 June 2014	Russia	Samara oblast			Bachilova polyana	53°4'28.68'' N	49°6'61.82" E
KT792895	54025	cinxia	Zoological Institute of the Russian Academy of Science	E. Pazhenkova	5 July 2014	Russia	Samara oblast		Kinel district		53°0'13.89'' N	50°9'24.60'' N
KT792897	4011	diamina	Zoological Institute of the Russian Academy of Science	E. Pazhenkova	14 June 2014	Russia	Bashkortostan		Zilair district		52° 3'54.27"N	57°26'28.75" E
KT874733	CCDB-17966 C01	didyma	McGuire Center, University of Florida	U. Eitschberger	10 August 1990	Austria		Tirol
KT874743	CCDB-17966 H04	didyma	McGuire Center, University of Florida	U. Eitschberger	10 August 1990	Austria		Tirol
KT874721	CCDB-17966 H05	didyma	McGuire Center, University of Florida	U. Eitschberger	10 August 1990	Austria		Tirol
KT874727	CCDB-17966 G05	didymoides	McGuire Center, University of Florida	R. Denno	1 July 1992	China	Beijing Municipality
KT874750	CCDB-17966 G04	didymoides	McGuire Center, University of Florida	O. Gorbunov	24 July 2002	Mongolia	Selenge Aimak
KT874740	CCDB-17966 F11	interrupta	McGuire Center, University of Florida	A. Chuvilin	21-22 July 1999	Armenia	Kadjaran
KT874741	CCDB-17966 F09	interrupta	McGuire Center, University of Florida	A. Dantchenko	23 July 1999	Armenia		Megri
KT874702	CCDB-17966 F10	interrupta	McGuire Center, University of Florida	A. Dantchenko	23 July 1999	Armenia		Megri
KT874705	CCDB-03033 H11	interrupta	Museum of insects, Pyatigorsk, Russia	Tikhonov V.	27 July 2008	Russia	North Caucasus	Kuban		riv. Daut	43°33'05'' N	42°04"34" E	1700 m
KT874734	CCDB-03033 H07	interrupta	Museum of insects, Pyatigorsk, Russia	Tikhonov V.	7 August 2010	Russia	Daghestan			Kurach	41°41'50'' N	47°33'32'' E	2100 m
KT874698	CCDB-17951 A03	latonigena	McGuire Center, University of Florida	S. Churkin	11 June 1997	Russia	Buryatia	Selenga r.	Tataurovo
KT874725	CCDB-17951 A04	latonigena	McGuire Center, University of Florida	S. Churkin	11 June 1997	Russia	Buryatia	Selenga r.	Tataurovo
KT874714	CCDB-17966 A01	latonigena	McGuire Center, University of Florida	R. Yakovlev	16 June 2001	Russia	Tuva	30 km N Kyzyl
KT874728	CCDB-17966 A02	latonigena	McGuire Center, University of Florida	R. Yakovlev	16 June 2001	Russia	Tuva	30 km N Kyzyl
KT874719	CCDB-17951 B04	liliputana	McGuire Center, University of Florida	W. Ten Hagen	2 May 1995	Syria			Damaskus	vic. Dimas
KT874748	CCDB-17966 C07	liliputana	McGuire Center, University of Florida	A. Dantchenko	20 June 1999	Armenia		Garni
KT874744	CCDB-17968 E10	liliputana	Zoological Institute of the Russian Academy of Science	V.Lukhtanov & A. Novikova	3 July 2014	Israel			Mt. Hermon
KT874708	CCDB-17951 B05	mauretanica	McGuire Center, University of Florida	P. Hofmann	26 May - 4 June 1980	Marokko			M. Atlas	Col du Zad
KT874711	CCDB-17966 B04	mixta	McGuire Center, University of Florida	O.V.Pak	12 July 2004	Tajikistan		Peter I Range
KT874739	CCDB-17950 H06	mixta	McGuire Center, University of Florida	Asaad	1-25 July 2004	Afghanistan		Mt. Yamak					3500-4000 m
KT874704	CCDB-17950 H08	mixta	McGuire Center, University of Florida	Asaad	1-25 July 2004	Afghanistan		Mt. Yamak					3500-4000 m
KT874731	CCDB-17966 B06	mixta	McGuire Center, University of Florida	E. Ivanova	19 June 2004	Tajikistan		Peter I Range
KT874722	CCDB-17966 D03	mixta	McGuire Center, University of Florida	V.Lukhtanov	5 July 1994	Tajikistan		Farob
KT874712	CCDB-17951 A12	mixta	McGuire Center, University of Florida	unknown	July 1992	Tajikistan		Peter I Range	Ganischou
KT874697	CCDB-17949 E02	montium	Zoological Institute of the Russian Academy of Science	V.A.Lukhtanov & A.V.Novikova	22 June 2013	Israel	N. Israel		Mt. Hermon		33°18'45.6'' N	035°47'41.9'' E	2056 m
KT874736	CCDB-17949 E03	montium	Zoological Institute of the Russian Academy of Science	V.A.Lukhtanov & A.V.Novikova	22 June 2013	Israel	N. Israel		Mt. Hermon		33°18'45.6'' N	035°47'41.9'' E	2056 m
KT874706	CCDB-03033 H03	neera	Museum of insects, Pyatigorsk, Russia	Tikhonov V.	12 August 2011	Russia	North Ossetia			pass Archonsky	42°48' 26'' N	44° 11' 50''E	2900 m
KT792900	224011	neera	Zoological Institute of the Russian Academy of Science	E. Pazhenkova	14 June 2014	Russia	Bashkortostan		Zilair district		52° 3'54.27"N	57°26'28.75" E
KT792908	MD11	neera	Zoological Institute of the Russian Academy of Science	V. Lukhtanov	26 July 2008	Bulgaria				Khvoyna			800m
KT792898	92015	neera	Zoological Institute of the Russian Academy of Science	E. Pazhenkova	27 June 2014	Russia	Samara oblast		Krasnoyarsky district	Volzhskiy	53°4'87.70''N	50°0'86.94'' E
KT792901	225015	neera	Zoological Institute of the Russian Academy of Science	E. Pazhenkova	27 June 2014	Russia	Samara oblast		Krasnoyarsky district	Volzhskiy	53°4'87.70''N	50°0'86.94'' E
KT792902	226015	neera	Zoological Institute of the Russian Academy of Science	E. Pazhenkova	27 June 2014	Russia	Samara oblast		Krasnoyarsky district	Volzhskiy	53°4'87.70''N	50°0'86.94'' E
KT792903	227015	neera	Zoological Institute of the Russian Academy of Science	E. Pazhenkova	27 June 2014	Russia	Samara oblast		Krasnoyarsky district	Volzhskiy	53°4'87.70''N	50°0'86.94'' E
KT792905	229016	neera	Zoological Institute of the Russian Academy of Science	E. Pazhenkova	27 June 2014	Russia	Samara oblast		Krasnoyarsky district	Volzhskiy	53°4'87.70''N	50°0'86.94'' E
KT874713	CCDB-03033 G03	neera	Museum of insects, Pyatigorsk, Russia	Tikhonov V.	27 May 2010	Russia	Daghestan	Makhachkala		Talgi	42° 52' 33'' N	47° 24' 18'' E	300 m
KT792899	188031	neera	Zoological Institute of the Russian Academy of Science	D. Shovkoon	29 June 2014	Russia	Orenburg oblast			Tugustemir, Nakas
KT874716	CCDB-03033 H08	neera	Museum of insects, Pyatigorsk, Russia	leg. Tikhonov V.	4 June 2009	Russia	Daghestan	Makhachkala		Talgi	42°52'33'' N	47°24'18'' E	300 m
KT874720	CCDB-17966 G12	neera	McGuire Center, University of Florida	A. Chuvilin	4-5 July 1998	Russia	Kaluga region
KT874730	CCDB-17966 H01	neera	McGuire Center, University of Florida	V. Lukhtanov	5 July 2001	Russia	Voronezh region
KT874709	CCDB-17966 C05	neera	McGuire Center, University of Florida	Miatleuski & Povilaitis	7 July 1996	Kazakhstan		Aktiobe
KT792907	160017	phoebe	Zoological Institute of the Russian Academy of Science	E. Pazhenkova	27 June 2014	Russia	Samara oblast			Bachilova polyana	53°4'28.68'' N	49°6'61.82" E
KT792906	52025	phoebe	Zoological Institute of the Russian Academy of Science	E. Pazhenkova	5 July 2014	Russia	Samara oblast		Kinel district		53°0'13.89'' N	50°9'24.60'' N
KT874696	CCDB-17966 G01	sutschana	McGuire Center, University of Florida	V. Tuzov	17-18 June 1995	Russia	Chita region	Talacha
KT874717	CCDB-17966 G02	sutschana	McGuire Center, University of Florida	V. Tuzov	17-18 June 1995	Russia	Chita region	Talacha
KT874701	CCDB-17966 G03	sutschana	McGuire Center, University of Florida	V. Tuzov	17-18 June 1995	Russia	Chita region	Talacha
KT874724	CCDB-17949 G08	telona	Zoological Institute of the Russian Academy of Science	V.A.Lukhtanov & A.V.Novikova	23 June 2013	Israel	N. Israel		Avivim		33°04'57'' N	035°27'34'' E	616 m
KT874747	CCDB-17949 G09	telona	Zoological Institute of the Russian Academy of Science	V.A.Lukhtanov & A.V.Novikova	23 June 2013	Israel	N. Israel		Avivim		33°04'57'' N	035°27'34'' E	616 m
KT874749	CCDB-17949 G10	telona	Zoological Institute of the Russian Academy of Science	V.A.Lukhtanov & A.V.Novikova	23 June 2013	Israel	N. Israel		Avivim		33°04'57'' N	035°27'34'' E	616 m
KT874693	CCDB-17949 C05	telona	Zoological Institute of the Russian Academy of Science	V.A.Lukhtanov	24 April 2013	Israel			Golan Heights	Odem Forest	33°10'26.57'' N	035°45'07.91'' E	960 m
KT874729	CCDB-17949 C06	telona	Zoological Institute of the Russian Academy of Science	V.A.Lukhtanov	24 April 2013	Israel			Golan Heights	Odem Forest	33°10'26.57'' N	035°45'07.91'' E	960 m
KT874723	CCDB-17968 E09	telona	Zoological Institute of the Russian Academy of Science	V.Lukhtanov & A. Novikova	3 July 2014	Israel			Mt. Hermon
KT874718	CCDB-17966 C08	turkestanica	McGuire Center, University of Florida	V.Lukhtanov	09 June 2000	Kazakhstan	Alma-Ata region
KT874707	CCDB-17966 C09	turkestanica	McGuire Center, University of Florida	V.Lukhtanov	09 June 2000	Kazakhstan	Alma-Ata region
KT874726	CCDB-17966 C12	turkestanica	McGuire Center, University of Florida	V.Lukhtanov	11-13 June 1994	Usbekistan		Nuratau Mts	Sarmitan
KT874745	CCDB-17966 D01	turkestanica	McGuire Center, University of Florida	V.Lukhtanov	11-13 June 1994	Usbekistan		Nuratau Mts	Sarmitan
KT874695	CCDB-17966 C02	turkestanica	McGuire Center, University of Florida	V.Lukhtanov	12 June 1998	Kazakhstan		Altai	Irtysh
KT874737	CCDB-17966 C03	turkestanica	McGuire Center, University of Florida	V.Lukhtanov	12 June 1998	Kazakhstan		Altai	Irtysh
KT874735	CCDB-17966 C04	turkestanica	McGuire Center, University of Florida	V.Lukhtanov	12 June 1998	Kazakhstan		Altai	Irtysh
HM404715	RPVL-00098	turkestanica	Zoological Institute of the Russian Academy of Science	V.A.Lukhtanov	13 June 2002	China		Urumchi	Khami	Nanshangou			1850 m
HM404716	RPVL-00099	turkestanica	Zoological Institute of the Russian Academy of Science	V.A.Lukhtanov	13 June 2002	China		Urumchi	Khami	Nanshangou			1850 m
KT874694	CCDB-17966 D04	turkestanica	McGuire Center, University of Florida	V.Lukhtanov	1-4 June 1994	Tajikistan			Altyn-Topkan
KT874715	CCDB-17966 D05	turkestanica	McGuire Center, University of Florida	V.Lukhtanov	1-4 June 1994	Tajikistan			Altyn-Topkan
HM404718	RPVL-00102	turkestanica	Zoological Institute of the Russian Academy of Science	V.A.Lukhtanov	15 June 2002	China		Urumchi	Khami	Karkyktag			2300 m
KT874699	CCDB-17951 A10	turkestanica	McGuire Center, University of Florida	Gieshuber	17 June 2007	China	Xinjiang	23 km SW Urumqi
KT874738	CCDB-17951 A11	turkestanica	McGuire Center, University of Florida	Gieshuber	17 June 2007	China	Xinjiang	23 km SW Urumqi
KT874710	CCDB-17966 C10	turkestanica	McGuire Center, University of Florida	V.Lukhtanov	20 July 1992	Kyrgyzstan		Issyk-Kul
KT874742	CCDB-17966 C11	turkestanica	McGuire Center, University of Florida	V.Lukhtanov	20 July 1992	Kyrgyzstan		Issyk-Kul
KT792904	228015	turkestanica	Zoological Institute of the Russian Academy of Science	E. Pazhenkova	27 June 2014	Russia		Samara oblast	Krasnoyarsky district	Volzhskiy	53°4'87.70''N	50°0'86.94'' E
KT874746	CCDB-17966 H03	turkestanica	McGuire Center, University of Florida	V. Lukhtanov	30 June 2001	Kyrgyzstan		Talassky Mts	Kara-Bura Pass
KT874703	CCDB-17966 C06	turkestanica	McGuire Center, University of Florida	Miatleuski & Povilaitis	7 July 1996	Kazakhstan		Aktiobe
