# Supplementary material for: DNA barcoding reveals twelve lineages with properties of phylogenetic and biological species within Melitaea didyma sensu lato (Lepidoptera, Nymphalidae)
Source: Zookeys. 2015 Nov 19;(538):35–46. doi: 10.3897/zookeys.538.6605 (PMC4722858; doi:10.3897/zookeys.538.6605)
Supplement: Supplementary material 2 — Table S2 [file zookeys-538-035-s002.xls]

## Sheet: Лист1
Supplementary Table S2. List of the samples used in this study
References: a – Dincă et al. 2015; b – Hausmann et al. 2011; c – Leneveu et al. 2009; d – Wahlberg and Zimmermann 2000; e - Vila and Bjorklund 2004; f - Ashfaq et al. 2013; g – Dincă et al. 2011; h – this study.
Species (original determination)	Haplogroup	BOLD/Collection number	GenBank number	Country	Ref.
didyma	didyma		JF415717	Germany	b
didyma	didyma		FJ462252	France	c
didyma	didyma		AF187763	France	d
didyma	didyma	BPAL2559-14|CCDB-17966_H05	KT874721	Austria	h
didyma	didyma	BPAL2558-14|CCDB-17966_H04	KT874743	Austria	h
didyma	didyma		GU669714	Spain	a
didyma	didyma		GU676138	Spain	a
didyma	didyma		GU676943	Spain	a
didyma	didyma	BPAL2495-14|CCDB-17966_C01	KT874733	Austria	h
didyma	didyma		HM901250	Spain	a
didyma	didyma		HM901349	Spain	a
didyma	didyma		HM901809	Spain	a
didyma	didyma		HM901810	Spain	a
didyma	didyma		KP870744	Spain	a
ninae	turkestanica		FJ462269	Kyrgyzstan	c
didyma	turkestanica		FJ462250	Kyrgyzstan	c
didyma	turkestanica	BPAL2505-14|CCDB-17966_C11	KT874742	Kyrgyzstan	h
didyma	turkestanica	BPAL2290-14|CCDB-17951_A10	KT874698	China	h
didyma	turkestanica	BPAL2291-14|CCDB-17951_A11	KT874725	China	h
didyma	turkestanica	BPAL2557-14|CCDB-17966_H03	KT874746	Kyrgyzstan	h
didyma	turkestanica	BPAL2511-14|CCDB-17966_D05	KT874715	Tadjikistan	h
didyma	turkestanica	BPAL2510-14|CCDB-17966_D04	KT874694	Tadjikistan	h
didyma	turkestanica	BPAL2507-14|CCDB-17966_D01	KT874745	Uzbekistan	h
didyma	turkestanica	BPAL2506-14|CCDB-17966_C12	KT874726	Uzbekistan	h
didyma	turkestanica	BPAL2498-14|CCDB-17966_C04	KT874735	Kazakhstan	h
didyma	turkestanica	BPAL2503-14|CCDB-17966_C09	KT874707	Kazakhstan	h
didyma	turkestanica	BPAL2502-14|CCDB-17966_C08	KT874718	Kazakhstan	h
didyma	turkestanica	BPAL2497-14|CCDB-17966_C03	KT874737	Kazakhstan	h
didyma	turkestanica	BPAL2496-14|CCDB-17966_C02	KT874695	Kazakhstan	h
didyma	turkestanica	BPAL098-10|RPVL-00098	HM404715	China	h
didyma	turkestanica	BPAL099-10|RPVL-00099	HM404716	China	h
didyma	turkestanica	BPAL102-10|RPVL-00102	HM404718	China	h
didyma	turkestanica	BPAL2500-14|CCDB-17966_C06	KT874703	Kazakhstan	h
didyma	turkestanica	BPAL2504-14|CCDB-17966_C10	KT874710	Kyrgyzstan	h
didyma	turkestanica	228015	KT792904	Russia	h
didymoides	didymoides		AF187762	Russia	d
didymoides	didymoides	BPAL2547-14|CCDB-17966_G05	KT874727	China	h
didymoides	didymoides	BPAL2546-14|CCDB-17966_G04	KT874750	Mongolia	h
interrupta	interrupta	BPAL2541-14|CCDB-17966_F11	KT874740	Armenia	h
interrupta	interrupta	BPAL2540-14|CCDB-17966_F10	KT874702	Armenia	h
interrupta	interrupta	BPAL2539-14|CCDB-17966_F09	KT874741	Armenia	h
interrupta	interrupta	BPAL1706-12|CCDB-03033_H07	KT874734	Daghestan	h
interrupta	interrupta	BPAL1710-12|CCDB-03033_H11	KT874705	Russia	h
interrupta	interrupta		FJ462260	Russia	c
interrupta	interrupta		AF187809	Russia	d
interrupta	interrupta	LOWAB282-09		Turkey
latonigena	latonigena		FJ663792	Russia	c
latonigena	latonigena		FJ663793	Russia	c
latonigena	latonigena		FJ663794	Russia	c
didyma pseudolatonigena	latonigena	BPAL2471-14|CCDB-17966_A01	KT874714	Russia	h
didyma pseudolatonigena	latonigena	BPAL2472-14|CCDB-17966_A02	KT874728	Russia	h
latonigena	latonigena	BPAL2284-14|CCDB-17951_A04	KT874704	Russia	h
latonigena	latonigena	BPAL2283-14|CCDB-17951_A03	KT874739	Russia	h
latonigena	latonigena		AY346234	Russia	e
latonigena	latonigena		AY350460	Russia	e
latonigena	latonigena		AY350461	Russia	e
didyma	liliputana	BPAL2296-14|CCDB-17951_B04	KT874738	Syria	h
didyma	liliputana	BPAL2718-14|CCDB-17968_E10	KT874744	Israel	h
didyma	liliputana	BPAL2501-14|CCDB-17966_C07	KT874748	Armenia	h
didyma	mauretanica		FJ462253	Morocco	c
didyma occidentalis	mauretanica	BPAL2297-14|CCDB-17951_B05	KT874712	Morocco	h
didyma	mauretanica		GU676464	Spain	a
didyma	mauretanica		HQ562781	Spain	a
didyma	mauretanica		HQ562782	Spain	a
didyma	mauretanica		HQ562783	Spain	a
didyma	mauretanica		KP870593	Spain	a
didyma	mauretanica		KP870659	Spain	a
chitralensis	chitralensis		KC158427	Pakistan	f
chitralensis	chitralensis		KC158426	Pakistan	f
enarea	mixta		FJ462256	Tadjikistan	c
chitralensis	mixta		FJ462242	Tajikistan	c
didyma	mixta	BPAL2509-14|CCDB-17966_D03	KT874722	Tadjikistan	h
mixta	mixta	BPAL2488-14|CCDB-17966_B06	KT874731	Tajikistan	h
mixta	mixta	BPAL2486-14|CCDB-17966_B04	KT874711	Tajikistan	h
mixta	mixta	BPAL2465-14|CCDB-17950_H06	KT874719	Aphganistan	h
mixta	mixta	BPAL2292-14|CCDB-17951_A12	KT874699	Tadjikistan	h
mixta	mixta	BPAL2467-14|CCDB-17950_H08	KT874708	Aphganistan	h
didyma	neera		KP870704	Romania	a
didyma	neera		KP870749	Romania	a
didyma	neera		HQ004793	Romania	g
didyma	neera		HQ004792	Romania	g
didyma	neera		HQ004791	Romania	g
didyma	neera		HQ004790	Romania	g
didyma	neera		HQ004789	Romania	g
didyma	neera		FJ462249	Russia	c
didyma	neera		FJ663786	Kazakhstan	c
didyma	neera		FJ663787	Kazakhstan	c
didyma	neera		FJ663788	Kazakhstan	c
didyma	neera	BPAL2555-14|CCDB-17966_H01	KT874730	Russia	h
didyma	neera	BPAL2554-14|CCDB-17966_G12	KT874720	Russia	h
didyma	neera	BPAL1690-12|CCDB-03033_G03	KT874713	Russia	h
didyma	neera	BPAL1707-12|CCDB-03033_H08	KT874716	Russia	h
interrupta	neera	BPAL1702-12|CCDB-03033_H03	KT874706	Russia	h
didyma	neera	188031	KT792899	Russia	h
didyma	neera	224011	KT792900	Russia	h
didyma	neera	225015	KT792901	Russia	h
didyma	neera	226015	KT792902	Russia	h
didyma	neera	227015	KT792903	Russia	h
didyma	neera	229016	KT792905	Russia	h
didyma	neera	92015	KT792898	Russia	h
didyma	neera	MD11	KT792908	Bulgaria	h
didyma	neera	BPAL2499-14|CCDB-17966_C05	KT874709	Kazakhstan	h
didyma	occidentalis		FJ462251	Spain	c
didyma	occidentalis		GU669712	Spain	a
didyma	occidentalis		GU669713	Spain	a
didyma	occidentalis		GU669715	Spain	a
didyma	occidentalis		GU675881	Spain	a
didyma	occidentalis		GU676395	Spain	a
didyma	occidentalis		GU676247	Spain	a
didyma	occidentalis		HM901283	Spain	a
didyma	occidentalis		GU676256	Spain	a
didyma	occidentalis		HM901221	Spain	a
didyma	occidentalis		HM901249	Spain	a
didyma	occidentalis		HM901251	Spain	a
didyma	occidentalis		HM901270	Spain	a
didyma	occidentalis		HM901292	Spain	a
didyma	occidentalis		HM901293	Spain	a
didyma	occidentalis		HM901300	Spain	a
didyma	occidentalis		HM901825	Spain	a
didymoides	sutschana		FJ462254	China	c
sutschana	sutschana		AF187805	Russia	d
sutschana	sutschana	BPAL2543-14|CCDB-17966_G01	KT874696	Russia	h
sutschana	sutschana	BPAL2545-14|CCDB-17966_G03	KT874701	Russia	h
sutschana	sutschana	BPAL2544-14|CCDB-17966_G02	KT874717	Russia	h
arduinna		83008	KT792884	Russia	h
arduinna		87011	KT792885	Russia	h
athalia		89014	KT792886	Russia	h
britomartis		155014	KT792893	Russia	h
britomartis		182032	KT792894	Russia	h
britomartis		110018	KT792891	Russia	h
britomartis		111018	KT792892	Russia	h
britomartis		90014	KT792890	Russia	h
britomartis		77007	KT792889	Russia	h
britomartis		53025	KT792887	Russia	h
cinxia		54025	KT792895	Russia	h
cinxia		99017	KT792896	Russia	h
cinxia		BPAL2639-14|CCDB-17967_G02	KT874732	Israel	h
cinxia		BPAL2640-14|CCDB-17967_G03	KT874751	Israel	h
diamina		4011	KT792897	Russia	h
montium		BPAL2235-13|CCDB-17949_E02	KT874697	Israel	h
montium		BPAL2236-13|CCDB-17949_E03	KT874736	Israel	h
phoebe		160017	KT792907	Russia	h
phoebe		52025	KT792906	Russia	h
telona		BPAL2717-14|CCDB-17968_E09	KT874723	Israel	h
telona		BPAL2215-13|CCDB-17949_C06	KT874729	Israel	h
telona		BPAL2214-13|CCDB-17949_C05	KT874693	Israel	h
telona		BPAL2266-13|CCDB-17949_G09	KT874747	Israel	h
telona		BPAL2267-13|CCDB-17949_G10	KT874749	Israel	h
telona		BPAL2265-13|CCDB-17949_G08	KT874724	Israel	h
